# Supplementary material for: Efficient homogeneous electrochemical water oxidation catalysed by macrocyclic nickel complexes with redox non-innocent pyridine coordination structures
Source: Royal Society of Chemistry journal article supplement (doi:10.1039/d4se01776e), 2025-01-01
Supplement: d4se01776e1.pdf [file d4se01776e1.pdf]

**Efficient homogeneous electrochemical water oxidation catalysed by macrocyclic nickel complex with redox non-innocent pyridine coordination structure**

Junqi Lin<sup>a,\*</sup>, Jinlin Hu<sup>a</sup>, Zhichao Qi<sup>a</sup>, Lianghui Zhang<sup>a</sup>, Zezhen Wang<sup>a</sup>, Xiangming Liang<sup>b,\*</sup>  
Zhijun Ruan<sup>a,\*</sup>

<sup>a</sup> Hubei Key Laboratory of Processing and Application of Catalytic Materials, College of Chemistry and Chemical Engineering, Huanggang Normal University, Huanggang, 438000 China.

<sup>b</sup> School of Basic Medical Sciences, Ningxia Medical University, Yinchuan, 750004, China.

Email: linjunqi@hgnu.edu.cn, liangxm@nxmu.edu.cn, ruanzhijun87@126.com

**Table S1** Crystallographic data and processing parameters for complex **1**

| Complex parameters                                  | [Ni(Me <sub>3</sub> pyclen)(CH <sub>3</sub> CN) <sub>2</sub> ](ClO <sub>4</sub> ) <sub>2</sub> ( <b>1</b> ) |
|-----------------------------------------------------|-------------------------------------------------------------------------------------------------------------|
| Empirical formula                                   | C <sub>18</sub> H <sub>30</sub> Cl <sub>2</sub> N <sub>6</sub> NiO <sub>8</sub>                             |
| Formula weight                                      | 588.09                                                                                                      |
| Temperature / K                                     | 293(2) K                                                                                                    |
| Wavelength / Å                                      | 0.71073                                                                                                     |
| Crystal system                                      | monoclinic                                                                                                  |
| Space group                                         | P2 <sub>1</sub> /c                                                                                          |
| <i>a</i> / Å                                        | 8.9341(9)                                                                                                   |
| <i>b</i> / Å                                        | 18.5476(14)                                                                                                 |
| <i>c</i> / Å                                        | 15.7100(15)                                                                                                 |
| $\alpha$ / deg                                      | 90                                                                                                          |
| $\beta$ / deg                                       | 90.057(3)                                                                                                   |
| $\gamma$ / deg                                      | 90                                                                                                          |
| Volume / Å <sup>3</sup>                             | 2603.2(4)                                                                                                   |
| <i>Z</i>                                            | 4                                                                                                           |
| Calculated density / Mg m <sup>3</sup>              | 1.501                                                                                                       |
| Absorption coefficient                              | 1.003 mm <sup>-1</sup>                                                                                      |
| <i>F</i> (000)                                      | 1224                                                                                                        |
| Crystal size / mm                                   | 0.3 × 0.28 × 0.26                                                                                           |
| 2 $\theta$ range / deg                              | 4.392 to 50.132                                                                                             |
| Index ranges                                        | -10 ≤ <i>h</i> ≤ 10, -20 ≤ <i>k</i> ≤ 22, -18 ≤ <i>l</i> ≤ 18                                               |
| Reflections collected                               | 28213                                                                                                       |
| Independent reflections                             | 4591 [ <i>R</i> <sub>int</sub> = 0.6389, <i>R</i> <sub>sigma</sub> = 0.1701]                                |
| Completeness to theta = 24.792°                     | 99.5 %                                                                                                      |
| Absorption correction                               | Semi-empirical from equivalents                                                                             |
| Refinement method                                   | Full-matrix least-squares on <i>F</i> <sup>2</sup>                                                          |
| Data / restraints / parameters                      | 4591 / 254 / 404                                                                                            |
| Goodness-of-fit on <i>F</i> <sup>2</sup>            | 1.076                                                                                                       |
| Final <i>R</i> indices [ <i>I</i> > 2σ( <i>I</i> )] | <i>R</i> <sub>1</sub> = 0.0996, <i>wR</i> <sub>2</sub> = 0.2424                                             |
| <i>R</i> indices (all data)                         | <i>R</i> <sub>1</sub> = 0.1294, <i>wR</i> <sub>2</sub> = 0.2655                                             |
| Largest diff. peak and hole                         | 0.72 and -0.53 e.Å <sup>-3</sup>                                                                            |

$$R_1 = \frac{\sum ||F_o| - |F_c||}{\sum |F_o|}, wR_2 = \left[ \frac{\sum (|F_o|^2 - |F_c|^2)^2}{\sum (F_o^2)} \right]^{1/2}$$

**Table S2** Selected bond lengths (Å) and angles (deg) for complex **1**

| Complex         | <b>1</b> | Bond angles (deg) |          |
|-----------------|----------|-------------------|----------|
| Bond length (Å) |          | N1–Ni1–N2         | 79.7(3)  |
| Ni1–N1          | 1.997(6) | N1–Ni1–N3         | 91.4(2)  |
| Ni1–N2          | 2.147(7) | N1–Ni1–N4         | 80.9(3)  |
| Ni1–N3          | 2.133(6) | N1–Ni1–N5         | 175.0(3) |
| Ni1–N4          | 2.161(7) | N1–Ni1–N6         | 87.9(3)  |
| Ni1–N5          | 2.052(7) | N2–Ni1–N3         | 84.0(3)  |
| Ni1–N6          | 2.105(8) | N2–Ni1–N4         | 157.1(3) |
|                 |          | N2–Ni1–N5         | 100.1(3) |
|                 |          | N2–Ni1–N6         | 95.2(3)  |
|                 |          | N3–Ni1–N4         | 84.5(3)  |
|                 |          | N3–Ni1–N5         | 93.5(3)  |
|                 |          | N3–Ni1–N6         | 170.9(3) |
|                 |          | N4–Ni1–N5         | 100.2(3) |
|                 |          | N4–Ni1–N6         | 96.0(3)  |
|                 |          | N5–Ni1–N6         | 87.2(3)  |

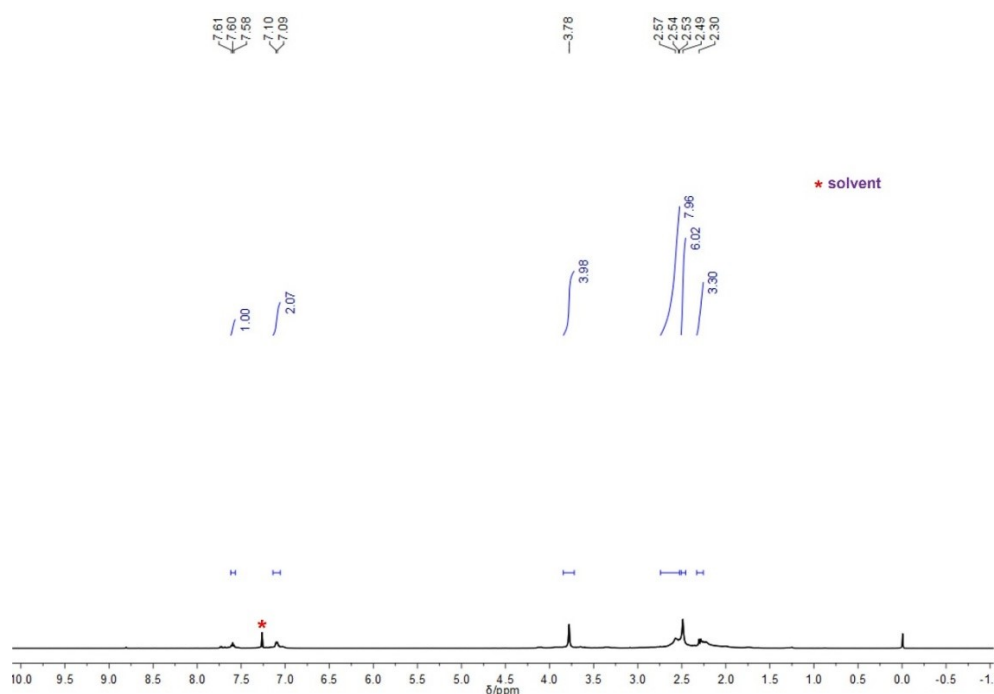**Fig. S1** The  $^1\text{H}$  NMR (400 MHz, chloroform-*d*) of the ligand Me<sub>3</sub>pyclen:  $\delta$  7.60 (t, 1H, CH<sub>py</sub>), 7.10 (d, 2H, CH<sub>py</sub>), 3.78 (s, 4H, CH<sub>2</sub>), 2.54 (t, 8H, CH<sub>2</sub>CH<sub>2</sub>), 2.49 (s, 6H, CH<sub>3</sub>), 2.90 (s, 3H, CH<sub>3</sub>).

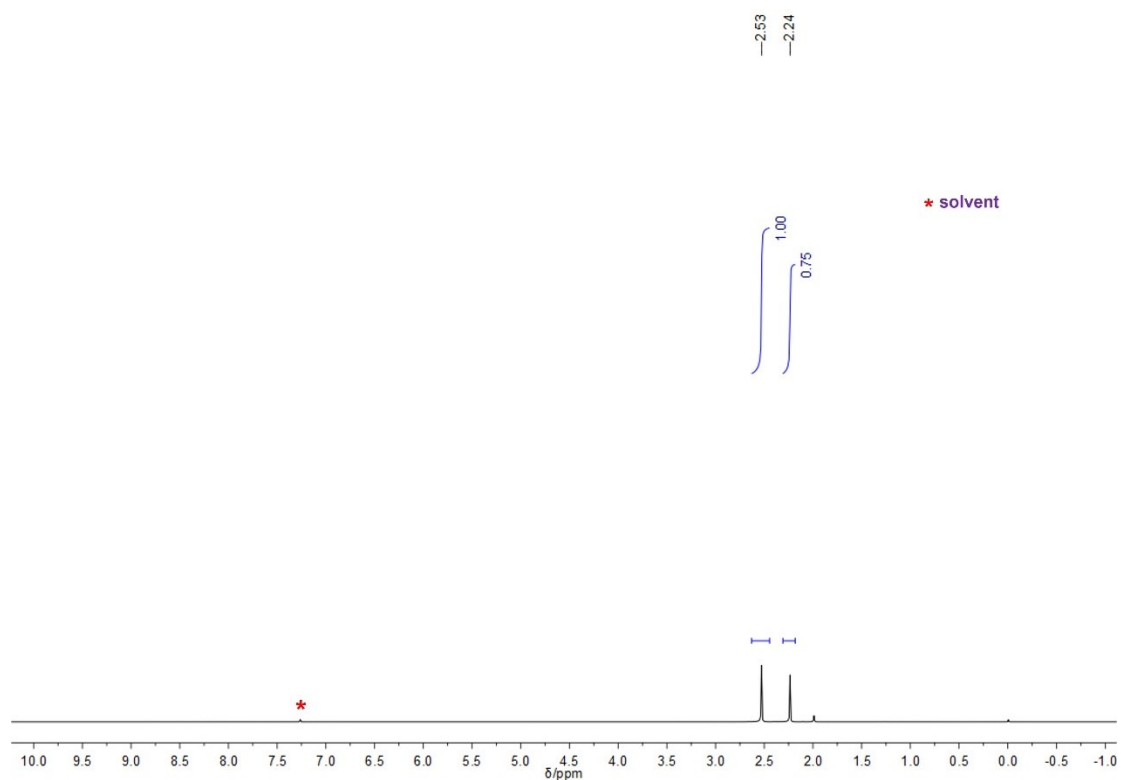

**Fig. S2** The  $^1\text{H}$  NMR (400 MHz, chloroform-*d*) of the ligand 12-TMC:  $\delta$  2.53 (s, 4H,  $\text{CH}_2\text{CH}_2$ ), 2.24 (s, 3H,  $\text{CH}_3$ ).

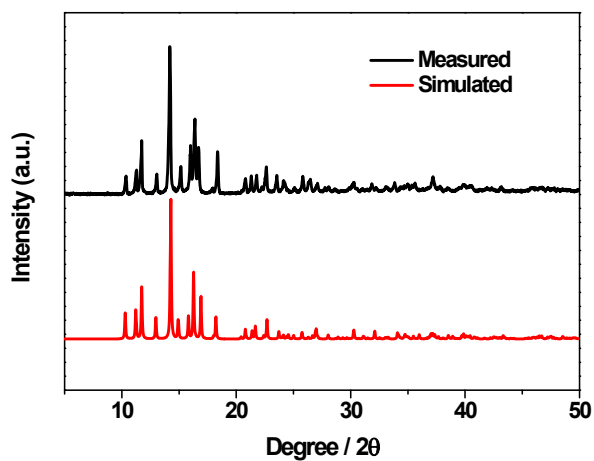

**Fig. S3** Measured and simulated PXRD pattern of the as-synthesized sample of **2**.

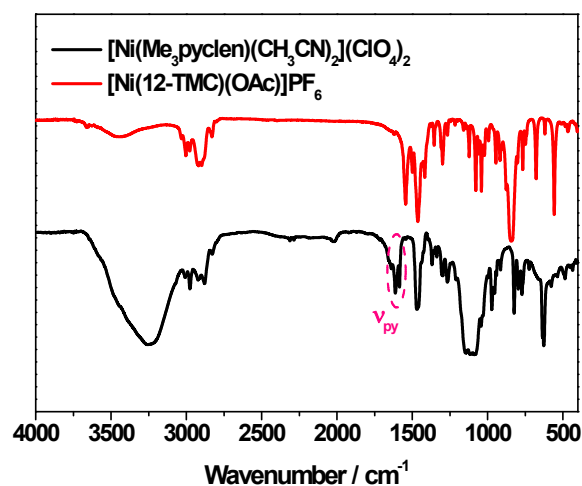

**Fig. S4** FT-IR spectra of complexes **1** and **2**, the vibration at around  $1600\text{ cm}^{-1}$  should be assigned to the signal of pyridine ring of the  $\text{Me}_3\text{pyclen}$  ligand.

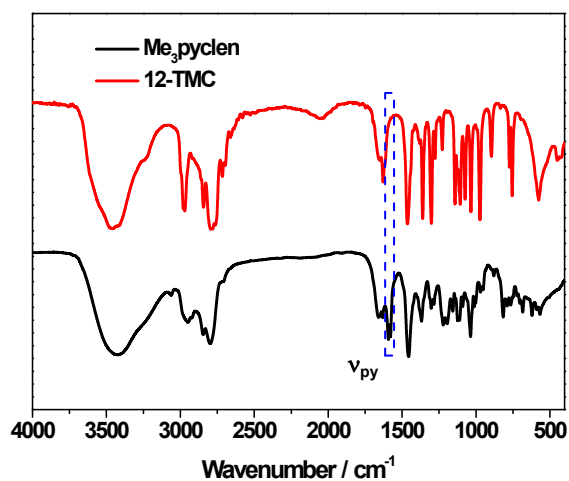

**Fig. S5** The FT-IR spectra of the  $\text{Me}_3\text{Pyclen}$  ligand and the 12-TMC ligand.

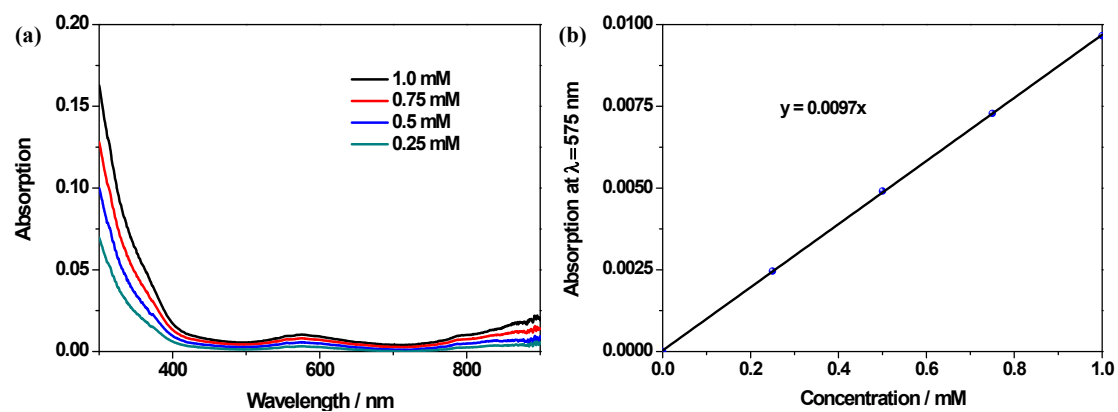

**Fig. S6** (a) UV-vis absorption spectra of **1** with various concentrations. (b) Relationship between the absorption value of the characteristic peak at  $\lambda = 575\text{ nm}$  and concentration of **1**.

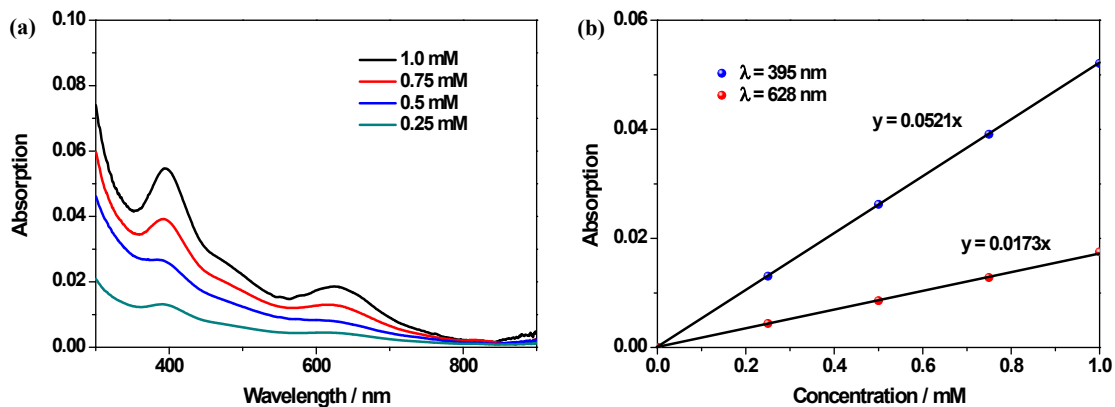

**Fig. S7** (a) UV-vis absorption spectra of **2** with various concentrations. (b) Relationship between the absorption value of the characteristic peak at  $\lambda = 575$  nm and concentration of **2**.

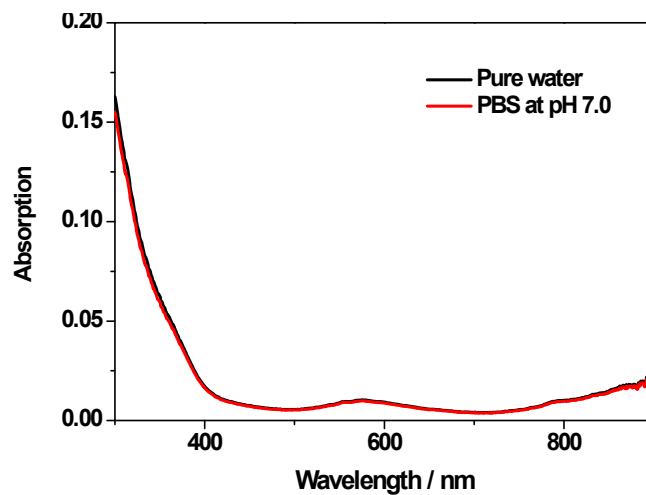

**Fig. S8** UV-vis absorption spectra of 1.0 mM of **1** in pure water and PBS at pH 7.0.

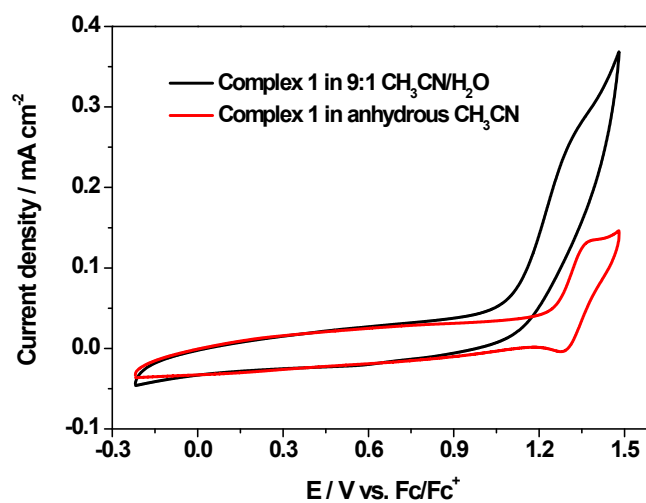

**Fig. S9** The CV test of 1 mM of **1** in anhydrous  $\text{CH}_3\text{CN}$  and 95:5  $\text{CH}_3\text{CN}/\text{H}_2\text{O}$  mixed solvent with 0.1 M tetrabutylammonium hexafluorophosphate as electrolyte, scan rates =  $100 \text{ mV s}^{-1}$ .

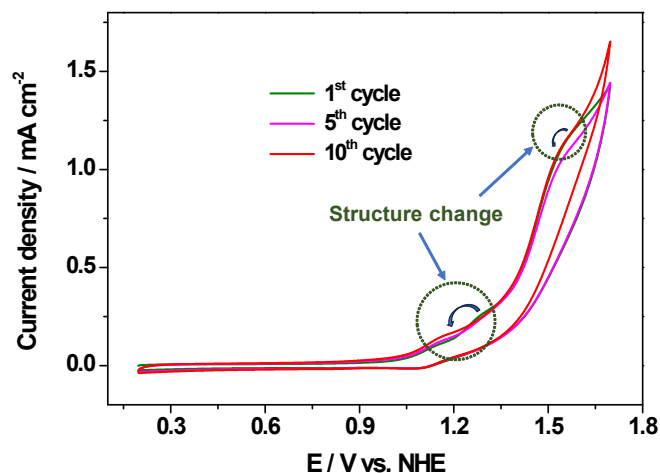

**Fig. 10** The 1<sup>st</sup>, 5<sup>th</sup>, and 10<sup>th</sup> CV scan of 1 mM of **2** in 0.1 M PBS at pH 7.0, scan rate = 100 mV/s.

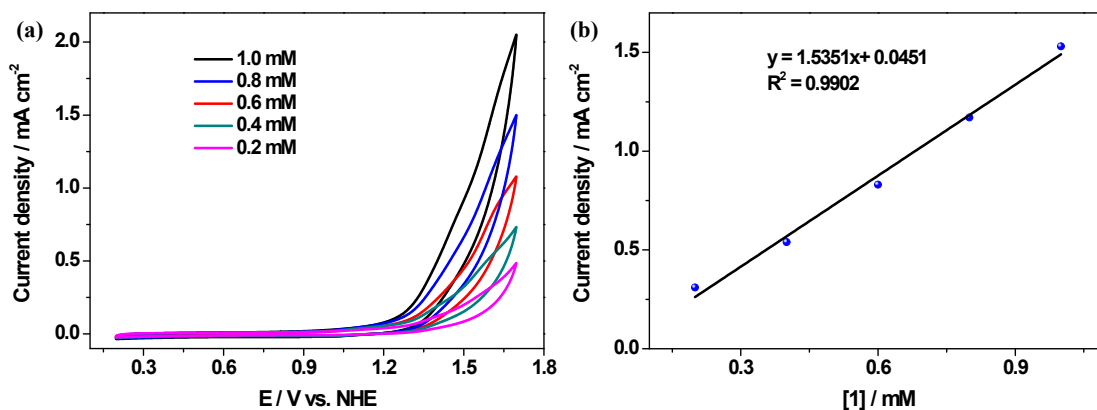

**Fig. S11** CV of various concentrations of **1** in 0.1 M PBSs at pH 7.0 with scan rate of 100 mV s<sup>-1</sup> (a). Dependence of catalytic current density of catalytic wave on the concentration of **1** (b).

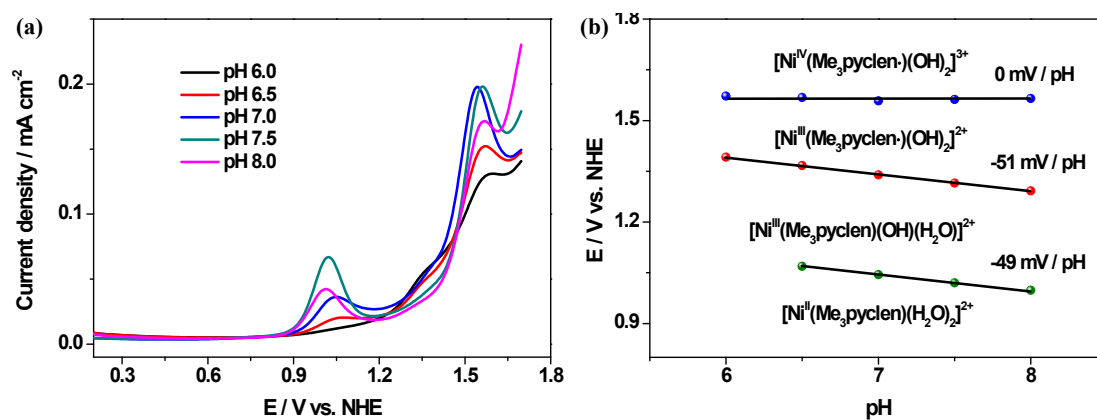

**Fig. S12** DPV tests of 1 mM of **1** in 0.1 M PBS at various pH values (a) and the relationship between the potential of each redox couple of **1** and the pH value of electrolyte (b).

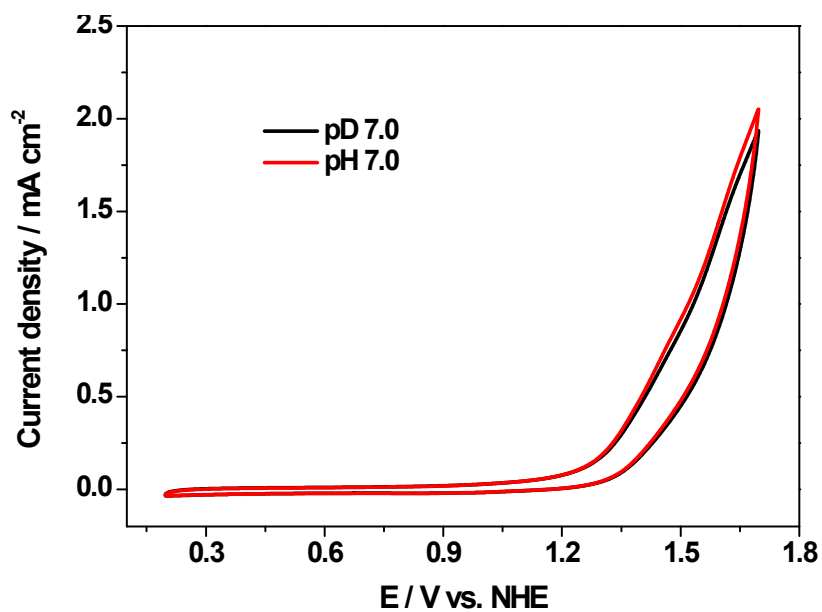

**Fig. S13** CV tests of 1.0 mM of **1** in neutral PBS with H<sub>2</sub>O and D<sub>2</sub>O as solvent.

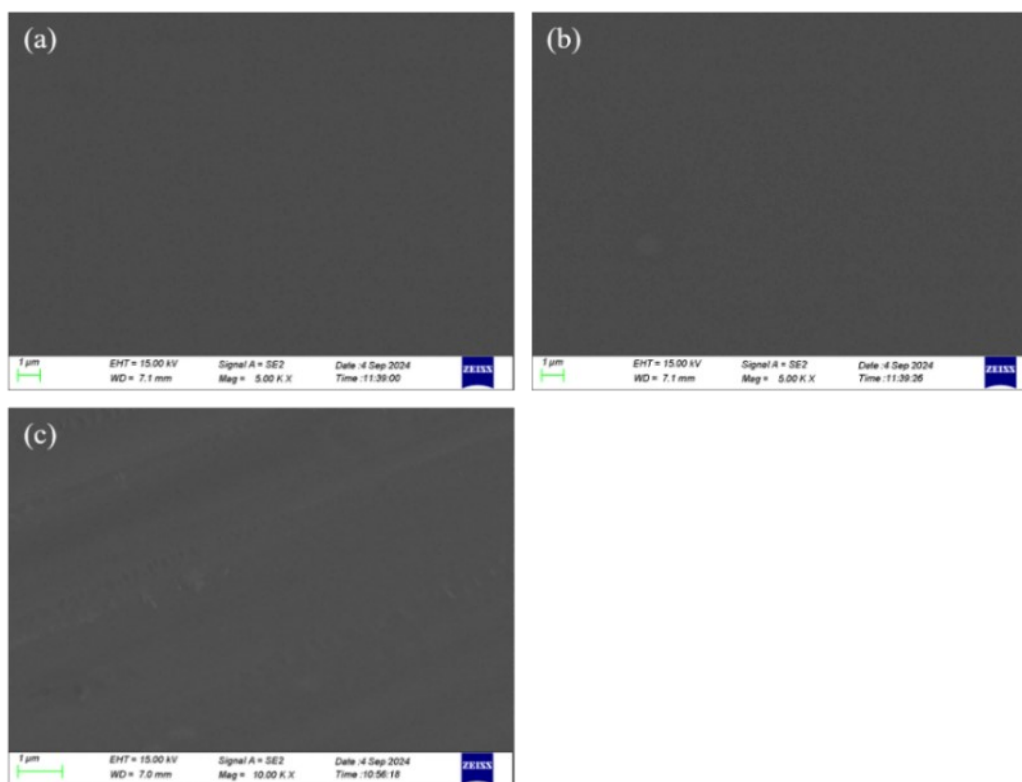

**Fig. S14** Morphology of clean ITO electrode (a), post-CPE ITO-1 (b) and post-CPE ITO-2 (c).



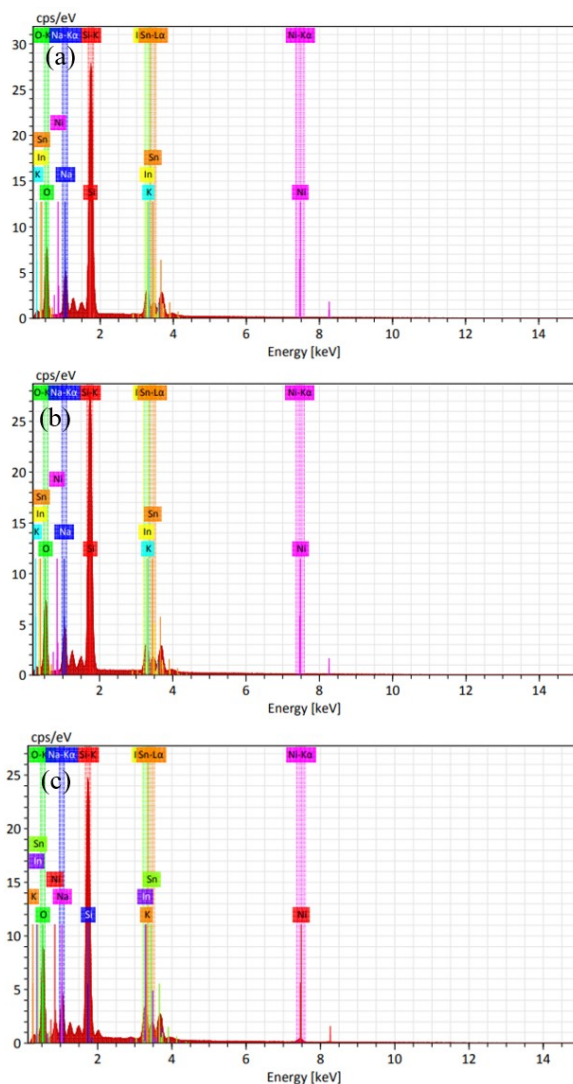

**Fig. S15** EDS analysis on the surface of clean ITO electrode (a), post-CPE ITO-1 (b) and post-CPE ITO-2 (c).

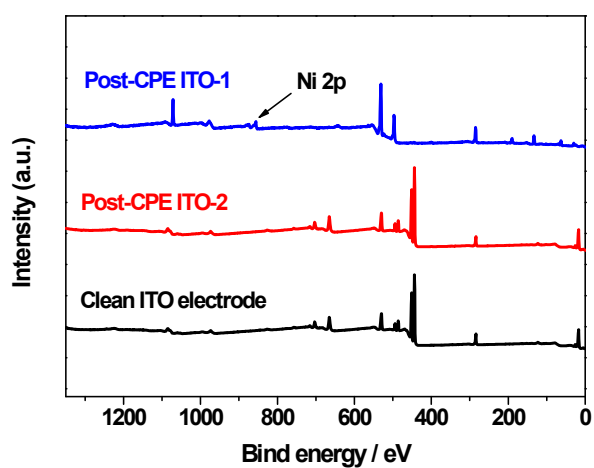

**Fig. S16** Full XPS spectra of clean ITO electrode, post-CPE ITO electrode. The binding energy has been calibrated by the C 1s peak.

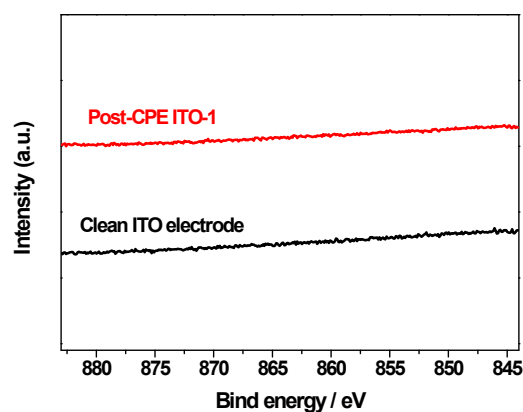

**Fig. S17** XPS spectra of Ni element on the surface of clean ITO electrode and post-CPE ITO-1 electrode. The binding energy has been calibrated by the C 1s peak.

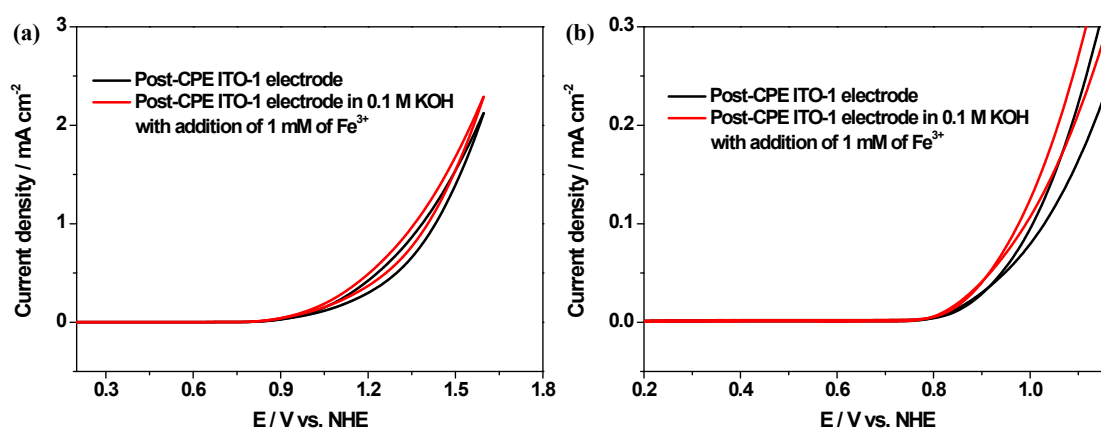

**Fig. S18** CV tests of post-CPE ITO-1 electrode in 0.1 M KOH solution with and without addition of 1 mM  $\text{Fe}^{3+}$  (a). Enlarged CV curve in low potential region (b).

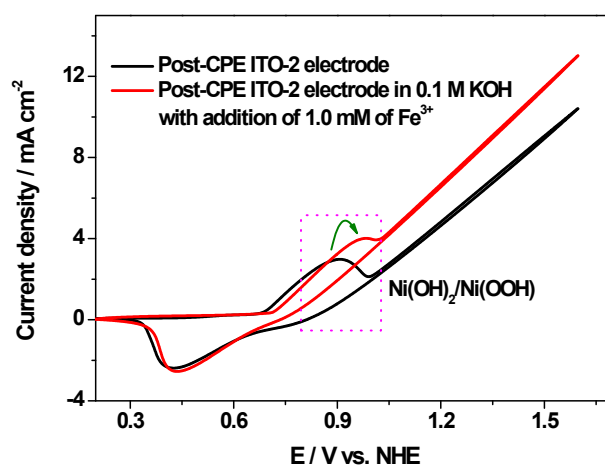

**Fig. S19** CV tests of post-CPE ITO-2 electrode in 0.1 M KOH solution with and without addition of 1 mM  $\text{Fe}^{3+}$ .

**Table S3** Onset overpotential and catalytic current at 1.60 V of **1** and some reported Ni based molecular WOCs.

| Catalyst                                                         | pH   | $\eta$ /mV <sup>a</sup> | $j_{\text{cat}}$ / mA cm <sup>-2</sup> <sup>b</sup> | $\nu$ / mV s <sup>-1</sup> <sup>c</sup> | Ref.      |
|------------------------------------------------------------------|------|-------------------------|-----------------------------------------------------|-----------------------------------------|-----------|
| [Ni(L)(H <sub>2</sub> O) <sub>2</sub> ] <sup>2+</sup>            | 6.5  | 533                     | 1.5                                                 | 100                                     | S1        |
| [Ni <sup>II</sup> -L1] <sup>2+</sup>                             | 7.0  | 580                     | 0.5                                                 | 100                                     | S2        |
| [Ni(TAML)] <sup>2-</sup>                                         | 7.0  | 680                     | 0.7                                                 | 100                                     | S3        |
| [NiL] <sup>2+</sup>                                              | 9.0  | 550                     | 1.4                                                 | 100                                     | S4        |
| [Ni( <i>meso</i> -L)] <sup>2+</sup>                              | 7.0  | 170                     | 1.2                                                 | 100                                     | S5        |
| [Ni(TMC)(CH <sub>3</sub> CN)] <sup>2+</sup>                      | 7.0  | 483                     | 1.3                                                 | 100                                     | S6        |
| [Ni( <i>mcp</i> )(H <sub>2</sub> O) <sub>2</sub> ] <sup>2+</sup> | 7.0  | 480                     | 1.2                                                 | 100                                     | S7        |
| [Ni( <i>mabpy</i> )] <sup>2+</sup>                               | 7.0  | 573                     | 0.7                                                 | 100                                     | S8        |
| [Ni( <i>bptn</i> )(H <sub>2</sub> O)] <sup>2+</sup>              | 9.0  | 351                     | 0.9                                                 | 100                                     | S9        |
| [Ni( <i>mbptn</i> )(CH <sub>3</sub> CN)] <sup>2+</sup>           | 9.0  | 401                     | 0.9                                                 | 100                                     | S9        |
| [Ni( <i>tmbptn</i> )(H <sub>2</sub> O)] <sup>2+</sup>            | 9.0  | 581                     | 1.4                                                 | 100                                     | S9        |
| Ni-PY5                                                           | 10.8 | 800                     | 2.5                                                 | 100                                     | S10       |
| <b>1</b>                                                         | 7.0  | 520                     | 2.0                                                 | 100                                     | This work |

<sup>a</sup>  $\eta$  = onset overpotential      <sup>b</sup>  $j_{\text{cat}}$  = current density at 1.60 V vs. NHE      <sup>c</sup> Scan rate of CV

test for onset overpotential and catalytic current measurement.

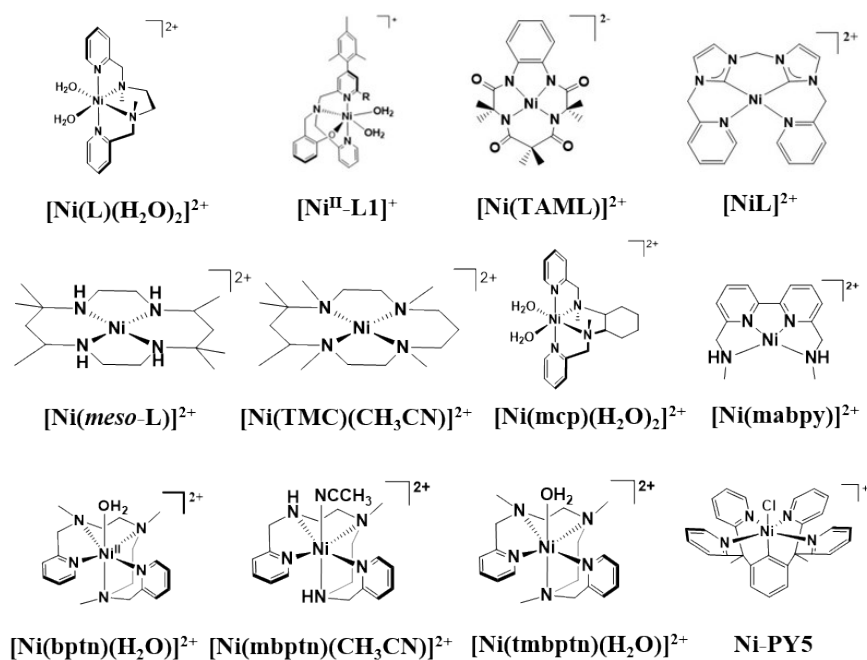

## References

- [1] G.-Y. Luo, H.-H. Huang, J.-W. Wang, T.-B. Lu, *ChemSusChem*, 2016, **9**, 485–491.
- [2] D. Wang and C. Bruner, *Inorg. Chem.*, 2017, **56**, 13638–13641.
- [3] H. Lee, X. Wu and L. Sun, *ChemSusChem*, 2020, **13**, 3277–3282.
- [4] H. Shahadat, H. Younus, N. Ahmad, M. A. Rahaman, Z. Khattak, S. Zhuiykov and F. Verpoort, *Catal. Sci. Technol.*, 2019, **9**, 5651–5659.
- [5] M. Zhang, M.-T. Zhang, C. Hou, Z.-F. Ke and T.-B. Lu, *Angew. Chem., Int. Edit.*, 2014, **53**, 13042–13048.
- [6] L. Zhang, F. Yu, Y. Shi, F. Li and H. Li, *Chem. Commun.*, 2019, **55**, 6122–6125.
- [7] J.-W. Wang, X.-Q. Zhang, H.-H. Huang and T.-B. Lu, *ChemCatChem*, 2016, **8**, 3287–3293.
- [8] Z. Ruan, J. Dong, J. Wang, Z. Qi, X. Chen, X. Liang and J. Lin, *Sustainable Energy Fuels*, 2024, **8**, 1769–1774.
- [9] X. Chen, X. Liao, C. Dai, L. Zhu, L. Hong, X. Yang, Z. Ruan, X. Liang and J. Lin, *Dalton Trans.*, 2022, **51**, 18678–18684.
- [10] L. Wang, L. Duan, R. Ambre, Q. Daniel, H. Chen, J. Sun, B. Das, A. Thapper, J. Uhlig, P. Dinér and L. Sun, *J. Catal.*, 2016, **335**, 72–78.
